# Supplementary material
Source: PubMed Central journal article supplement (PMC6022858)
Supplement: NIHMS922065-supplement-1.pdf [file NIHMS922065-supplement-1.pdf]

**Table 2. HRs (95% CIs) for the association of MTHFR genotypes with incident AMD in the Women's Genome Health Study.**

|                             | <u>MTHFR 677</u>                       |                  |                  | P trend | <u>MTHFR 1298</u> |                  |                  | P trend |
|-----------------------------|----------------------------------------|------------------|------------------|---------|-------------------|------------------|------------------|---------|
|                             | CC<br>(n=10,237)                       | CT<br>(n=9,925)  | TT<br>(n=2,611)  |         | AA<br>(n=10,553)  | AC<br>(n=9,882)  | CC<br>(n=2,338)  |         |
|                             | <b><u>Total AMD</u></b>                |                  |                  |         |                   |                  |                  |         |
| Events                      | 184                                    | 153              | 47               |         | 178               | 171              | 35               |         |
| Crude <sup>*</sup>          | 1.00                                   | 0.85 (0.69-1.05) | 0.99 (0.72-1.36) | 0.46    | 1.00              | 1.04 (0.84-1.28) | 0.89 (0.62-1.28) | 0.76    |
| Multivariate 1 <sup>†</sup> | 1.00                                   | 0.86 (0.69-1.06) | 0.98 (0.70-1.35) | 0.44    | 1.00              | 1.05 (0.85-1.29) | 0.89 (0.62-1.29) | 0.81    |
| Multivariate 2 <sup>‡</sup> | 1.00                                   | 0.85 (0.68-1.06) | 0.95 (0.68-1.32) | 0.36    | 1.00              | 1.05 (0.85-1.30) | 0.90 (0.62-1.30) | 0.87    |
|                             | <b><u>Visually-significant AMD</u></b> |                  |                  |         |                   |                  |                  |         |
| Events                      | 80                                     | 59               | 18               |         | 62                | 73               | 22               |         |
| Crude <sup>*</sup>          | 1.00                                   | 0.75 (0.53-1.05) | 0.84 (0.50-1.40) | 0.20    | 1.00              | 1.28 (0.91-1.80) | 1.62 (0.99-2.63) | 0.04    |
| Multivariate 1 <sup>†</sup> | 1.00                                   | 0.78 (0.56-1.10) | 0.88 (0.53-1.46) | 0.30    | 1.00              | 1.28 (0.91-1.80) | 1.55 (0.94-2.55) | 0.054   |
| Multivariate 2 <sup>‡</sup> | 1.00                                   | 0.78 (0.55-1.09) | 0.84 (0.50-1.41) | 0.24    | 1.00              | 1.29 (0.92-1.82) | 1.58 (0.96-2.60) | 0.04    |

Abbreviations: HR, hazard ratio; CI, confidence interval; MTHFR, methylenetetrahydrofolate reductase; AMD, age-related macular degeneration.

<sup>\*</sup> Adjusted for age, randomized treatment assignment (aspirin, vitamin E, beta carotene)

<sup>†</sup> Additionally adjusted for smoking (current, past, never), alcohol use (rarely/never, 1-3 drinks/month, 1-6 drinks/week, and  $\geq 1$  drinks/day), body mass index (continuous), postmenopausal hormone use, history of hypertension (ever diagnosis by physician or self-reported blood pressure  $\geq 140/90$ ; yes or no), history of hyperlipidemia (baseline history of cholesterol-medication use or a physician diagnosis of high cholesterol or a self-reported cholesterol of at least 240 mg/dL; yes or no), multivitamin use (current, past/never), history of eye exam in the last 2 years.

<sup>‡</sup> Additionally adjusted for homocysteine ( $\mu\text{mol/L}$ ).
